# Supplementary material for: Integrated genomic and transcriptomic analysis suggests KRT18 mutation and MTAP are key genetic alterations related to the prognosis between astrocytoma and glioblastoma
Source: PubMed Central journal article supplement — Ann Transl Med. 2021 Apr;9(8):713. doi: 10.21037/atm-21-1317 (PMC8106028; doi:10.21037/atm-21-1317), 2021-04
Supplement: atm-09-08-713-supplementary.pdf [file atm-09-08-713-supplementary.pdf]

Table S1 Top50 differential expression genes between astrocytoma and GBM ("A" represents Astrocytoma, "G" represents GBM)

| Regulation | Ensembl ID      | log2 Fold Change | Adj.Pval | Symbol    | Chr                      | Type           | G1       | G2       | G3       | G4       | G5       | G6       | G7       | G8       | G9       | G10      | G11      | G12      | A1       | A2       | A3       | A4       | A5       | A6       | A7       | A8       | A9       | A10      | A11      | A12      |
|------------|-----------------|------------------|----------|-----------|--------------------------|----------------|----------|----------|----------|----------|----------|----------|----------|----------|----------|----------|----------|----------|----------|----------|----------|----------|----------|----------|----------|----------|----------|----------|----------|----------|
| Up         | ENSG00000171540 | 5.771921         | 1.66E-09 | OTP       | 5q14.1                   | protein_coding | 6.426277 | 6.825115 | 6.811379 | 4.906306 | 7.388565 | 4.260653 | 8.658824 | 5.835228 | 7.526613 | 7.440927 | 2.767688 | 3.767555 | 2        | 2.274915 | 4.327029 | 2        | 2        | 2        | 2        | 2.470725 | 3.289711 | 2        | 2.295332 | 2.292749 |
| Up         | ENSG00000188257 | 5.67735          | 9.50E-05 | PLA2G2A   | 1p36.13                  | protein_coding | 13.63023 | 11.02922 | 11.72424 | 2        | 2.885558 | 12.29303 | 7.121251 | 9.241633 | 4.310706 | 9.163588 | 9.38197  | 4.288247 | 3.603118 | 3.304195 | 4.438155 | 2        | 4.560333 | 8.161433 | 2        | 2.825062 | 5.697232 | 6.781977 | 2.295332 | 2        |
| Up         | ENSG00000275385 | 5.076155         | 8.88E-07 | CCL18     | 17q12                    | protein_coding | 4.261931 | 3.174614 | 3.278085 | 5.695371 | 2.509685 | 2.920106 | 6.731205 | 2.624578 | 3.781442 | 5.789778 | 7.256807 | 2.244865 | 2        | 2.505734 | 2        | 2.397595 | 2        | 2.311362 | 2.280045 | 2.470725 | 2.868367 | 2.265893 | 2.295332 | 2        |
| Up         | ENSG00000131668 | 4.893882         | 2.07E-06 | BARX1     | 9q22.32                  | protein_coding | 4.538211 | 2.394329 | 5.120337 | 2.831582 | 7.998316 | 4.043656 | 6.487857 | 5.462386 | 4.554685 | 2.799269 | 2        | 2.799027 | 2.327399 | 2        | 3.140983 | 2.397595 | 2        | 2        | 2.716068 | 2.470725 | 2.270707 | 2.265893 | 2.540359 | 2.535998 |
| Up         | ENSG00000137673 | 4.737592         | 6.12E-06 | MMP7      | 11q22.2                  | protein_coding | 7.451936 | 4.156282 | 6.349245 | 5.442994 | 2.277235 | 2.532195 | 7.446278 | 3.781535 | 5.687483 | 8.424225 | 10.79426 | 2.944791 | 2        | 3.631908 | 4.075248 | 2.397595 | 2.889008 | 2.311362 | 5.523237 | 2.825062 | 3.40664  | 2.684495 | 4.212469 | 2.925916 |
| Up         | ENSG00000146674 | 4.615296         | 1.41E-08 | IGFBP3    | 7p12.3                   | protein_coding | 14.36851 | 12.24219 | 11.11142 | 7.22431  | 11.52642 | 12.19541 | 14.04757 | 11.51804 | 13.14433 | 11.98951 | 11.80288 | 7.419739 | 7.392819 | 5.355664 | 5.706324 | 6.668623 | 9.626268 | 7.848159 | 6.214676 | 3.728936 | 10.20414 | 8.26477  | 4.87984  | 4.626291 |
| Up         | ENSG00000137197 | 4.552285         | 2.04E-05 | CDSN      | CHR_HSCHR6_MHC_COX_C TG1 | protein_coding | 3.332583 | 4.514746 | 6.328927 | 2        | 3.98775  | 5.549306 | 6.128506 | 2.858092 | 4.396699 | 3.310595 | 2.767688 | 5.894687 | 2        | 2        | 2.850833 | 2        | 2        | 2        | 3.321715 | 2.254476 | 2.498555 | 2.490324 | 2        | 2        |
| Up         | ENSG00000183072 | 4.492517         | 3.93E-11 | NKX2-5    | 5q35.1                   | protein_coding | 7.017164 | 6.809028 | 6.720717 | 3.49526  | 7.336562 | 3.356958 | 8.27438  | 7.452826 | 8.385033 | 8.961353 | 6.009401 | 4.583643 | 2.594069 | 3.304195 | 3.589215 | 4.357561 | 3.187675 | 2.567309 | 3.192445 | 4.030846 | 4.358389 | 2.265893 | 2.932567 | 3.364464 |
| Up         | ENSG00000106178 | 4.326043         | 3.14E-03 | CCL24     | 7q11.23                  | protein_coding | 4.013306 | 2.394329 | 2.361806 | 2        | 2        | 2.532195 | 6.818107 | 2.858092 | 2.936693 | 3.687355 | 11.08856 | 2.244865 | 2.327399 | 2        | 2.850833 | 2.397595 | 2        | 2        | 2.280045 | 2        | 2.270707 | 2        | 2.295332 | 2        |
| Up         | ENSG00000170454 | 4.318729         | 1.02E-05 | KRT75     | 12q13.13                 | protein_coding | 10.80149 | 6.167831 | 4.681594 | 9.195071 | 2.277235 | 7.893427 | 8.631089 | 4.340048 | 8.001698 | 6.981658 | 4.476772 | 3.843882 | 3.476767 | 4.691085 | 6.603046 | 2.708956 | 2.278551 | 3.66353  | 2.514466 | 3.452134 | 4.804376 | 3.008558 | 2.295332 | 3.325559 |
| Up         | ENSG00000173432 | 4.295869         | 1.79E-07 | SAA1      | 11p15.1                  | protein_coding | 12.72355 | 7.671822 | 11.4887  | 4.747887 | 3.539446 | 5.342784 | 6.886729 | 7.530973 | 5.00151  | 6.654235 | 10.23186 | 4.901952 | 5.153355 | 4.543055 | 4.438155 | 4.166848 | 4.208076 | 3.959972 | 5.050313 | 3.728936 | 8.797233 | 4.215007 | 4.063621 | 4.459287 |
| Up         | ENSG00000174343 | 4.148618         | 9.68E-05 | CHRNA9    | 4p14                     | protein_coding | 9.251217 | 7.430299 | 5.697264 | 4.955469 | 2.277235 | 6.818327 | 9.90592  | 5.351899 | 9.557639 | 7.40777  | 12.24213 | 3.767555 | 2.819053 | 4.737235 | 5.873834 | 3.537972 | 2.889008 | 4.128393 | 3.746984 | 2.658745 | 7.605201 | 6.913737 | 3.806877 | 2.292749 |
| Up         | ENSG00000197587 | 4.103129         | 1.40E-06 | DMBX1     | 1p33                     | protein_coding | 8.187395 | 4.43313  | 5.255654 | 2.831582 | 4.998504 | 5.729933 | 7.88915  | 5.531607 | 5.965893 | 4.073003 | 2.767688 | 3.414048 | 2.819053 | 3.631908 | 4.206624 | 2.708956 | 2        | 2.567309 | 2.280045 | 2.658745 | 3.61541  | 2.265893 | 2.295332 | 2.74409  |
| Up         | ENSG00000163497 | 4.098435         | 1.48E-04 | FEV       | 2q35                     | protein_coding | 3.008884 | 2        | 3.713815 | 6.393048 | 8.031405 | 2.532195 | 7.633641 | 3.992652 | 3.33546  | 7.069086 | 2.767688 | 3.198415 | 2.327399 | 2.274915 | 3.140983 | 3.37103  | 2        | 3.289995 | 4.146566 | 3.346657 | 2.270707 | 2        | 2.295332 | 2.292749 |
| Up         | ENSG00000239839 | 3.943858         | 2.92E-02 | DEFA3     | 8p23.1                   | protein_coding | 4.822552 | 2        | 2        | 2        | 2.277235 | 2.290499 | 4.432288 | 2.858092 | 2.383731 | 2        | 3.038302 | 2.244865 | 2.594069 | 2        | 2.487251 | 2        | 2        | 2        | 2        | 2        | 2        | 2        | 2        | 2        |
| Up         | ENSG00000115457 | 3.823131         | 8.35E-09 | IGFBP2    | 2q35                     | protein_coding | 12.51356 | 11.94883 | 12.66228 | 10.34345 | 12.80782 | 10.58748 | 13.54642 | 13.38554 | 13.63359 | 12.7765  | 13.64244 | 7.796226 | 9.357899 | 5.325771 | 10.08637 | 6.455654 | 8.644342 | 7.576838 | 8.279757 | 8.391427 | 10.9642  | 9.091617 | 6.49703  | 6.21318  |
| Up         | ENSG00000197153 | 3.809606         | 1.05E-09 | HIST1H3J  | 6p22.1                   | protein_coding | 7.476746 | 9.542688 | 10.21228 | 11.18445 | 10.53828 | 8.259622 | 7.973604 | 9.274818 | 7.564263 | 9.786891 | 8.32889  | 6.952663 | 5.382074 | 4.948138 | 3.930698 | 5.671347 | 4.452197 | 3.42554  | 4.342107 | 6.004179 | 7.965942 | 5.997845 | 5.007588 | 5.812334 |
| Up         | ENSG00000167767 | 3.805729         | 4.06E-06 | KRT80     | 12q13.13                 | protein_coding | 5.103105 | 5.147027 | 3.438401 | 3.028225 | 2        | 5.576537 | 7.741333 | 5.531607 | 6.44098  | 5.268418 | 7.088284 | 4.443492 | 2.327399 | 2.879463 | 3.382437 | 3.82313  | 3.64605  | 2.567309 | 2.892921 | 3.550422 | 2.498555 | 2        | 2.295332 | 2.292749 |
| Up         | ENSG00000113924 | 3.791455         | 1.63E-06 | HGD       | 3q13.33                  | protein_coding | 8.918434 | 6.288768 | 8.371641 | 4.747887 | 4.202195 | 5.063693 | 7.92222  | 5.721328 | 9.156751 | 6.339544 | 11.681   | 5.408584 | 4.020409 | 6.083564 | 5.356247 | 5.597633 | 4.799775 | 4.709336 | 4.214734 | 4.541656 | 6.113159 | 5.308116 | 4.68975  | 4.270389 |
| Up         | ENSG00000100985 | 3.781975         | 9.78E-04 | MMP9      | 20q13.12                 | protein_coding | 12.32917 | 11.00736 | 10.14559 | 7.662114 | 10.0029  | 12.86473 | 14.42465 | 9.358164 | 5.937482 | 13.17213 | 10.90306 | 5.682444 | 5.450909 | 6.789738 | 5.465227 | 5.106925 | 4.926425 | 5.30925  | 4.892777 | 6.486213 | 11.65529 | 5.51656  | 5.047774 | 4.201495 |
| Up         | ENSG00000168779 | 3.70592          | 1.03E-05 | SHOX2     | 3q25.32                  | protein_coding | 9.841004 | 9.620795 | 8.968952 | 5.806728 | 7.998316 | 8.384284 | 9.647718 | 8.544887 | 9.178158 | 7.229491 | 7.454666 | 7.407215 | 2.327399 | 4.123918 | 7.485203 | 2.964902 | 3.187675 | 2.311362 | 4.40181  | 3.452134 | 7.237983 | 3.008558 | 4.139963 | 2.292749 |
| Up         | ENSG00000122133 | 3.700063         | 1.94E-03 | PAEP      | 9q34.3                   | protein_coding | 2.814974 | 2        | 2        | 3.622475 | 2.709828 | 3.5886   | 7.601335 | 2.624578 | 3.33546  | 4.791138 | 6.863025 | 3.767555 | 2        | 2.274915 | 3.140983 | 2.964902 | 2        | 2.311362 | 2        | 2.470725 | 2.498555 | 2        | 2.295332 | 2        |
| Up         | ENSG00000163661 | 3.692964         | 1.56E-06 | PTX3      | 3q25.32                  | protein_coding | 12.74669 | 9.237794 | 9.951601 | 4.955469 | 4.38885  | 8.989036 | 11.45897 | 8.754854 | 8.631065 | 8.854669 | 8.147768 | 5.930133 | 6.113029 | 5.496489 | 6.191891 | 5.305195 | 6.333982 | 5.343889 | 5.700111 | 6.409716 | 8.127988 | 7.654799 | 6.117366 | 5.640805 |
| Up         | ENSG00000215644 | 3.689396         | 4.54E-05 | GCGR      | 17q25.3                  | protein_coding | 8.352887 | 3.174614 | 4.475225 | 5.372342 | 2.509685 | 4.191884 | 8.993536 | 5.966016 | 3.499921 | 3.572365 | 2        | 5.162568 | 3.338279 | 3.72646  | 3.589215 | 2.708956 | 3.187675 | 2.784618 | 3.440348 | 3.642438 | 3.022896 | 2.855607 | 3.494333 | 4.201495 |
| Up         | ENSG00000078399 | 3.672813         | 1.37E-03 | HOXA9     | 7p15.2                   | protein_coding | 2.814974 | 2.958281 | 2.361806 | 5.003012 | 2.277235 | 4.191884 | 6.433843 | 4.798954 | 2        | 3.893027 | 4.057079 | 4.443492 | 2        | 2.274915 | 2.850833 | 2        | 2        | 2        | 2        | 2.254476 | 3.709461 | 2.265893 | 2        | 2.292749 |
| Up         | ENSG00000164651 | 3.654028         | 2.67E-04 | SP8       | 7p21.1                   | protein_coding | 8.921449 | 5.728892 | 7.228215 | 4.802649 | 2        | 5.777644 | 7.437155 | 6.502737 | 10.10933 | 3.159435 | 2        | 6.678218 | 4.830656 | 2.505734 | 4.637616 | 4.444228 | 2        | 5.273759 | 3.746984 | 2.974172 | 4.172737 | 5.337297 | 3.373047 | 3.364464 |
| Up         | ENSG00000181649 | 3.637655         | 3.97E-07 | PHLDA2    | 11p15.4                  | protein_coding | 6.83727  | 6.192843 | 6.287413 | 4.042133 | 9.322958 | 5.629502 | 8.56562  | 6.413864 | 6.399923 | 6.303943 | 9.441489 | 4.174616 | 3.185071 | 3.176026 | 4.727876 | 4.265354 | 4.273087 | 3.66353  | 4.279825 | 3.346657 | 5.828786 | 4.978364 | 3.494333 | 2.292749 |
| Up         | ENSG00000166407 | 3.614048         | 2.13E-06 | LMO1      | 11p15.4                  | protein_coding | 5.923431 | 7.783064 | 9.280662 | 11.1702  | 10.42189 | 6.949093 | 10.95017 | 8.553234 | 9.330682 | 12.59071 | 3.929851 | 6.94402  | 7.216236 | 6.065589 | 4.893039 | 7.046505 | 5.150576 | 7.754708 | 6.093177 | 7.440906 | 5.144561 | 4.902297 | 6.117366 | 7.509206 |
| Up         | ENSG00000172789 | 3.581079         | 4.26E-05 | HOXC5     | 12q13.13                 | protein_coding | 4.658751 | 3.936961 | 6.465485 | 6.848347 | 6.688671 | 4.943342 | 7.177117 | 6.919102 | 3.903967 | 5.027765 | 6.24144  | 3.601602 | 2        | 3.304195 | 4.54133  | 2        | 2        | 2        | 2.280045 | 3.452134 | 3.61541  | 4.44688  | 2.74975  | 2        |
| Up         | ENSG00000276368 | 3.57488          | 3.92E-08 | HIST1H2AJ | 6p22.1                   | protein_coding | 8.646893 | 10.83833 | 11.3855  | 12.37469 | 11.38546 | 8.808458 | 8.939643 | 11.74084 | 8.530033 | 11.37448 | 10.12337 | 8.253378 | 6.27366  | 4.986856 | 9.104359 | 7.694034 | 5.344538 | 3.140381 | 7.183821 | 8.134469 | 7.937072 | 6.998382 | 6.243838 | 6.24776  |
| Up         | ENSG00000123364 | 3.55023          | 4.13E-04 | HOXC13    | 12q13.13                 | protein_coding | 2.325488 | 5.040826 | 2.891498 | 3.84751  | 2.885558 | 5.974731 | 6.60654  | 4.854042 | 2.383731 | 3.310595 | 4.648246 | 3.843882 | 2        | 2        | 7.573054 | 2.397595 | 2.278551 | 2        | 2.280045 | 2        | 2.270707 | 3.938594 | 2.295332 | 2.535998 |
| Up         | ENSG00000273983 | 3.548979         | 4.87E-05 | HIST1H3G  | 6p22.2                   | protein_coding | 8.435361 | 7.521974 | 10.6097  | 4.569902 | 10.82513 | 8.881241 | 9.217866 | 11.30536 | 7.787609 | 11.44615 | 9.12672  | 7.776887 | 7.081622 | 4.052708 | 4.54133  | 4.813298 | 4.70871  | 2.973438 | 4.40181  | 5.584416 | 9.313803 | 5.152641 | 4.68975  | 2.535998 |
| Up         | ENSG00000189120 |                  |          |           |                          |                |          |          |          |          |          |          |          |          |          |          |          |          |          |          |          |          |          |          |          |          |          |          |          |          |

**Table S2** Results of CIBERSORT ("A" represents Astrocytoma,"G"represents GBM)

| Sample | B cells naive | B cells memory | Plasma cells | T cells CD8 | T cells CD4 naive | T cells CD4 memory resting | T cells CD4 memory activated | T cells follicular helper | T cells regulatory (Tregs) | T cells gamma delta | NK cells resting | NK cells activated | Monocytes | Macrophages M0 | Macrophages M1 | Macrophages M2 | Dendritic cells resting | Dendritic cells activated | Mast cells resting | Mast cells activated | Eosinophils | Neutrophils | P-value | Pearson Correlation | RMSE     |
|--------|---------------|----------------|--------------|-------------|-------------------|----------------------------|------------------------------|---------------------------|----------------------------|---------------------|------------------|--------------------|-----------|----------------|----------------|----------------|-------------------------|---------------------------|--------------------|----------------------|-------------|-------------|---------|---------------------|----------|
| G1     | 0             | 0              | 0.021255     | 0           | 0                 | 0.02982                    | 0                            | 0.05054                   | 0.012248                   | 0                   | 0.048611         | 0                  | 0.092635  | 0.325563       | 0              | 0              | 0                       | 0.0006                    | 0                  | 0.123217             | 0.073848    | 0.221693    | 0.01    | 0.209747            | 1.053869 |
| G2     | 0.007126      | 0              | 0.069559     | 0           | 0                 | 0.131187                   | 0                            | 0.09034                   | 0                          | 0                   | 0.036246         | 0.073768           | 0         | 0.390978       | 0.002289       | 0.190703       | 0                       | 0                         | 0                  | 0.007163             | 0           | 0.0006      | 0.11    | 0.128375            | 1.075117 |
| G3     | 0             | 0              | 0.156878     | 0           | 0                 | 0.076898                   | 0                            | 0.061154                  | 0                          | 0                   | 0.055414         | 0.003927           | 0.03597   | 0.088267       | 0.019239       | 0.36973        | 0                       | 0                         | 0                  | 0.033466             | 0.021532    | 0.077524    | 0.3     | 0.073726            | 1.06218  |
| G4     | 0             | 0              | 0.269493     | 0.099511    | 0.004769          | 0                          | 0                            | 0.137833                  | 0                          | 0                   | 0                | 0.09237            | 0         | 0              | 0              | 0.332928       | 0                       | 0                         | 0                  | 0.059417             | 0           | 0.003679    | 0.97    | -0.0331             | 1.093059 |
| G5     | 0.078223      | 0              | 0.0119       | 0           | 0                 | 0.081814                   | 0                            | 0.07348                   | 0.020759                   | 0                   | 0.017863         | 0.041676           | 0         | 0.437857       | 0              | 0.157493       | 0                       | 0                         | 0.047238           | 0                    | 0           | 0.031697    | 0.91    | -0.013              | 1.151704 |
| G6     | 0             | 0.009936       | 0.010334     | 0           | 0                 | 0.196722                   | 0                            | 0.052518                  | 0                          | 0                   | 0.069317         | 0.018052           | 0.0004    | 0.311443       | 0              | 0.227514       | 0                       | 0.001555                  | 0                  | 0.08856              | 0           | 0.013643    | 0.02    | 0.173622            | 1.045728 |
| G7     | 0             | 0              | 0.010534     | 0.010315    | 0.033499          | 0.012459                   | 0                            | 0.006129                  | 0                          | 0                   | 0.094716         | 0                  | 0.017828  | 0.687736       | 0              | 0              | 0                       | 0                         | 0                  | 0.126784             | 0           | 0           | 0       | 0.55647             | 0.852898 |
| G8     | 0             | 0.009374       | 0.032023     | 0           | 0                 | 0.127675                   | 0                            | 0.127697                  | 0                          | 0                   | 0.081857         | 0.04766            | 0.033408  | 0.206309       | 0              | 0.221377       | 0                       | 0                         | 0.042685           | 0                    | 0.010044    | 0.059891    | 0.33    | 0.066887            | 1.072258 |
| G9     | 0             | 0              | 0.017113     | 0           | 0                 | 0.093871                   | 0                            | 0.048008                  | 0                          | 0                   | 0                | 0.099695           | 0.158153  | 0              | 0.054591       | 0.276039       | 0                       | 0                         | 0                  | 0.188644             | 0.015248    | 0.048638    | 0.59    | 0.030044            | 1.108175 |
| G10    | 0             | 0.014283       | 0.006073     | 0           | 0                 | 0.219659                   | 0                            | 0.039851                  | 0.032903                   | 0                   | 0.018197         | 0.027607           | 0.018073  | 0.38912        | 0              | 0.163822       | 0                       | 0                         | 0                  | 0.055848             | 0           | 0.014564    | 0.02    | 0.184971            | 1.047569 |
| G11    | 0             | 0              | 0.041072     | 0.034302    | 0                 | 0.091885                   | 0                            | 0.071732                  | 0                          | 0                   | 0.011533         | 0.007397           | 0.086953  | 0.190306       | 0.059727       | 0.302347       | 0                       | 0                         | 0                  | 0.057049             | 0.016003    | 0.029694    | 0.08    | 0.149518            | 1.042882 |
| G12    | 0.019951      | 0              | 0.115304     | 0           | 0                 | 0.093642                   | 0                            | 0.131757                  | 0                          | 0                   | 0.036918         | 0.047937           | 0.096332  | 0.018556       | 0.010984       | 0.254536       | 0                       | 0                         | 0                  | 0.0943               | 0.064787    | 0.014995    | 0.87    | -0.0054             | 1.078999 |
| A1     | 0.077271      | 0              | 0.0724       | 0           | 0                 | 0.067586                   | 0                            | 0.162985                  | 0                          | 0                   | 0                | 0.078885           | 0.241728  | 0              | 0.06472        | 0.131463       | 0                       | 0                         | 0                  | 0                    | 0.042562    | 0.0604      | 0.93    | -0.019              | 1.09556  |
| A2     | 0             | 0              | 0.157287     | 0.039707    | 0                 | 0.133231                   | 0                            | 0.098687                  | 0                          | 0                   | 0                | 0.084671           | 0.234276  | 0              | 0              | 0.146869       | 0                       | 0                         | 0                  | 0.10488              | 0           | 0.0004      | 1       | -0.0514             | 1.10294  |
| A3     | 0.097393      | 0              | 0.193297     | 0           | 0                 | 0.029905                   | 0                            | 0.044646                  | 0                          | 0                   | 0                | 0.046772           | 0.108984  | 0.033412       | 0.003113       | 0.296911       | 0                       | 0                         | 0                  | 0.10768              | 0.02437     | 0.013517    | 0.42    | 0.053568            | 1.060346 |
| A4     | 0.076703      | 0              | 0.225093     | 0           | 0.1588            | 0                          | 0                            | 0                         | 0                          | 0                   | 0                | 0.049222           | 0.159661  | 0              | 0.004364       | 0.230114       | 0                       | 0                         | 0                  | 0.011737             | 0.056757    | 0.02755     | 1       | -0.0583             | 1.089811 |
| A5     | 0.138777      | 0              | 0.07886      | 0           | 0.161954          | 0.011592                   | 0                            | 0                         | 0                          | 0                   | 0.060017         | 0.018787           | 0.066033  | 0.01976        | 0              | 0.262631       | 0                       | 0                         | 0                  | 0.125723             | 0.055868    | 0           | 0.98    | -0.0389             | 1.094664 |
| A6     | 0.025796      | 0              | 0.074325     | 0           | 0                 | 0.049477                   | 0                            | 0.056707                  | 0                          | 0                   | 0                | 0.046538           | 0.149874  | 0              | 0              | 0.202911       | 0                       | 0                         | 0                  | 0.328984             | 0.043539    | 0.021848    | 0.11    | 0.135149            | 1.07619  |
| A7     | 0             | 0.023976       | 0.191275     | 0           | 0.034441          | 0.039606                   | 0                            | 0                         | 0                          | 0                   | 0.002927         | 0.009662           | 0.074021  | 0              | 0              | 0.326844       | 0                       | 0                         | 0                  | 0.234234             | 0.028527    | 0.034488    | 0.82    | 0.002787            | 1.107107 |
| A8     | 0             | 0              | 0.177623     | 0           | 0.041626          | 0                          | 0                            | 0.061427                  | 0                          | 0                   | 0                | 0.033461           | 0.090843  | 0              | 0              | 0.211869       | 0                       | 0                         | 0                  | 0.331766             | 0.031828    | 0.019557    | 0.43    | 0.052196            | 1.109589 |
| A9     | 0.03469       | 0              | 0.119016     | 0.004411    | 0                 | 0.047342                   | 0                            | 0.022879                  | 0.015186                   | 0                   | 0                | 0.016159           | 0         | 0.132151       | 0.014659       | 0.470202       | 0                       | 0                         | 0                  | 0.073811             | 0           | 0.049494    | 0.14    | 0.115237            | 1.068932 |
| A10    | 0.00713       | 0              | 0.036162     | 0           | 0                 | 0.143523                   | 0                            | 0.024153                  | 0                          | 0                   | 0                | 0.073642           | 0.127215  | 0              | 0.035602       | 0.230768       | 0                       | 0.005194                  | 0                  | 0.259674             | 0.036072    | 0.020863    | 0.29    | 0.080298            | 1.087846 |
| A11    | 0             | 0              | 0.095038     | 0           | 0                 | 0.061789                   | 0                            | 0.039887                  | 0                          | 0.005814            | 0                | 0.022868           | 0.257673  | 0              | 0              | 0.294874       | 0                       | 0                         | 0                  | 0.130741             | 0.088312    | 0.003004    | 0.08    | 0.144129            | 1.041817 |
| A12    | 0             | 0              | 0.365861     | 0           | 0.033194          | 0.005359                   | 0                            | 0                         | 0                          | 0                   | 0                | 0.024594           | 0.043115  | 0              | 0              | 0.155775       | 0                       | 0                         | 0                  | 0.276375             | 0.093791    | 0.001936    | 0.87    | -0.0059             | 1.113863 |
